# Supplementary material for: Construction of MoO2/MoS2 heterojunctions on carbon nanotubes as high-efficiency electrocatalysts for H2 production
Source: Royal Society of Chemistry journal article supplement (doi:10.1039/d3ce00674c), 2023-01-01
Supplement: d3ce00674c1.pdf [file d3ce00674c1.pdf]

## Electronic Supplementary Information

### **Construction of MoO<sub>2</sub>/MoS<sub>2</sub> heterojunction on carbon nanotubes as high-efficiency electrocatalysts for H<sub>2</sub> production**

Xianpei Ren,<sup>a,\*</sup> Qiang Li,<sup>a</sup> Fang Ling,<sup>a</sup> Qiwei Hu,<sup>a</sup> Liuqing Pang<sup>b, c,\*</sup>

<sup>a</sup>School of Physics and Electronic Engineering, Sichuan University of Science and Engineering, Zigong 643000, China

<sup>b</sup>The First Monitoring and Application Center, CEA, Tianjin 300180, China.

<sup>c</sup>Key Laboratory of Advanced Energy Materials Chemistry (Ministry of Education), College of Chemistry, Nankai University, Tianjin 300071, China.

\*Corresponding author: E-mail: renxianpei@163.com,

E-mail: pangliuqing2021@fmac.ac.cn.

## Experimental

### *Materials and reagents*

Chemical reagents including Molybdenum chloride ( $\text{MoCl}_5$ ), thiourea ( $\text{CH}_4\text{N}_2\text{S}$ ) and Molybdenum Trioxide ( $\text{MoO}_3$ ) were analytically pure and not further processed. Carbon nanotube (CNT) was purchased from Nanjing XFNANO Materials Tech Co., Ltd. Nafion (5 wt%) was purchased from Sigma-Aldrich. Pt and glassy carbon electrodes were purchased from Tianjin Aidahengsheng Technology. Co. Ltd.

### *Synthesis of $\text{MoS}_2@\text{CNT}$*

The  $\text{MoS}_2@\text{CNT}$  was synthesized by a sol-gel process according to our previous work with some modifications [1]. Firstly, 136 mg molybdenum chloride ( $\text{MoCl}_5$ ) and 228 mg thiourea ( $\text{CH}_4\text{N}_2\text{S}$ ) were mixed in a 50 mL beaker. Excessive ethanol was slowly added into the beaker and ultrasonication for 10 min to form homogenous solution, then 96 mg CNT was dispersed in the solution and ultrasonication for 30 min to form a uniform suspension. The gel-like precursor powders were obtained by drying the suspension, and transferred into a corundum boat and heated in a quartz tube furnace for 2 h under argon gas (150 sccm) flow at 500 °C. Afterwards, the product was cooled to room temperature under the protection of argon gas and samples were collected from the quartz tube. The resulting product was named  $\text{MoS}_2@\text{CNT}$ .

### *Synthesis of $\text{MoO}_3/\text{MoS}_2@\text{CNT}$*

The  $\text{MoO}_3/\text{MoS}_2@\text{CNT}$  was synthesized by an evaporation crystallization and hydrogen thermal reduction method. Firstly, 70 mg the above obtained  $\text{MoS}_2@\text{CNT}$  was dispersed in 50 mL  $\text{MoO}_3$  saturated solution and magnetically stirring for 30 min to form a uniform suspension. The black precursor powders (referred as  $\text{MoO}_3/\text{MoS}_2@\text{CNT}$ ) were formed after drying and transferred to a quartz tube furnace for 2 h under  $\text{Ar}/\text{H}_2$  (100/10 sccm) flow at 600 °C. After that, the product was cooled to room temperature under ambient  $\text{Ar}/\text{H}_2$  and collected from the quartz tube. The

resulting product was named MoO<sub>2</sub>/MoS<sub>2</sub>@CNT.

#### *Materials characterizations*

The samples were characterized by field emission scanning electron microscope (FESEM, JSM-7610F), transmission electron microscope (TEM; FEI, Tecnai G2), X-ray diffraction (XRD, Bruker D8 ADVANCE with a Cu-Ka source), X-ray photoelectron spectroscopy (XPS, Thermo-VG Scientific, ESCALAB 250).

#### *Electrochemical measurements*

All electrochemical measurements were performed on a CHI 604E electrochemical workstation using a three-electrode system at room temperature. The system consists of a glassy carbon electrode (GCE, 3 mm in diameter) as the working electrode, Pt wire electrode as counter and Ag/AgCl (3.5 M KCl) as reference electrode, respectively. For the glassy carbon (GC) electrode modified by catalysts as the working electrode, 2.0 mg of catalyst powder was ultrasonically dispersed in 500  $\mu$ L 4:1 (v/v) water/ ethanol mixed solvents, combined with 30 mL Nafion solution (5 wt% Sigma-Aldrich), the mixed solution was sonicated for 30 min to form the catalyst ink. Subsequently, 5  $\mu$ L of the above catalyst ink was dropped onto the polished GCE surface. The polarization curves were obtained by linear sweep voltammetry (LSV) at a scan rate of 10 mV/s. All of the potentials were calibrated to a reversible hydrogen electrode (RHE). Cyclic voltammetry (CV) was conducted between -0.4 and 0.1 V vs RHE at 50 mV s<sup>-1</sup> to study the cycling stability. The Nyquist plots were measured with frequencies ranging from 10<sup>-2</sup> to 10<sup>6</sup> Hz with an AC voltage amplitude of 5 mV at an overpotential of 400 mV. The estimation of the effective active surface area of the electrocatalysts was carried out according to the literature by cyclic voltammograms with various scan rates (20-100 mV s<sup>-1</sup>) in the 0.1-0.2 V vs. RHE region.

#### *Density functional theory calculations*

All calculations were conducted by Vienna Ab initio Simulation Package (VASP) based on the density functional theory (DFT). The exchange-correlation potential is described by using the generalized gradient approximation of Perdew-Burke-

Ernzerhof (GGA-PBE). The projector augmented-wave (PAW) method is employed to treat interactions between ion cores and valence electrons. The plane-wave cutoff energy was fixed to 400 eV. Given structural models were relaxed until the Hellmann-Feynman forces smaller than -0.02 eV/Å and the change in energy smaller than 10<sup>-5</sup> eV was attained. During the relaxation, the Brillouin zone was represented by a  $\Gamma$  centered k-point grid of 3×3×1. Grimme's DFT-D3 methodology was used to describe the dispersion interactions among all the atoms in adsorption models.

The adsorption energy ( $\Delta E_{*H}$ ) of H is calculated by:  $\Delta E_{*H} = E_{*H} - E_{*} - 1/2 E_{H_2}$ , where  $E_{*H}$ ,  $E_{*}$ , and  $E_{H_2}$  are the energies of hydrogen adsorbed on catalyst, isolated catalyst, and hydrogen gas molecule, respectively.

The catalytic activity for HER could be evaluated by the hydrogen adsorption free energy of  $\Delta G_{H*}$ :  $\Delta G_{H*} = \Delta E_{*H} - \Delta E_{ZPE} - T\Delta S_H$ , Where  $\Delta E_{ZPE}$  is the zero-point energy change between the adsorbed state of the catalyst and gas phase state.  $\Delta S_H$  is the difference in entropy and T is taken as 298.15 K.

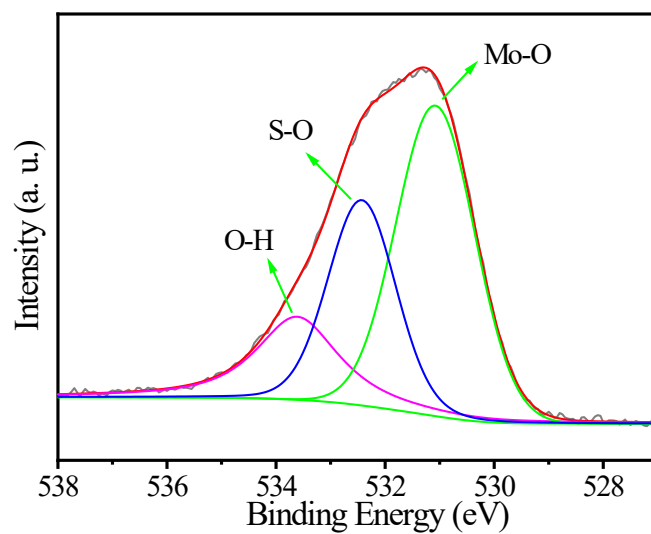

**Fig. S1.** High resolution XPS spectrum of O 1s of MoO<sub>2</sub>/MoS<sub>2</sub>@CNT.

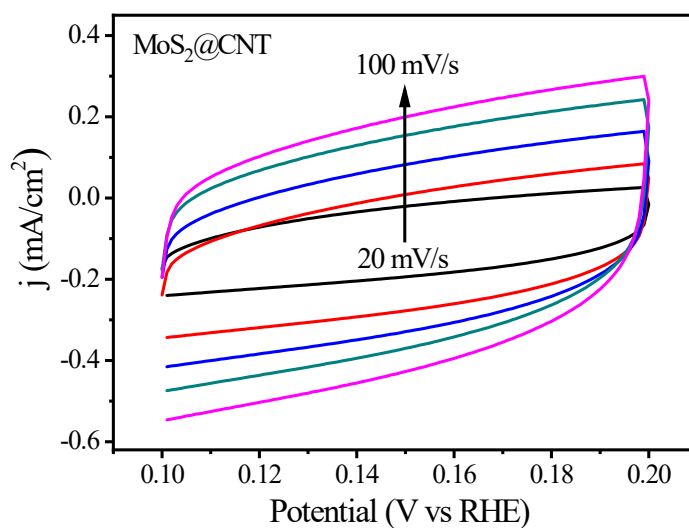

**Fig. S2.** (a, b) Electrochemical cyclic voltammogram of MoS<sub>2</sub>@CNT at different potential scanning rates. The scan rates are 20, 40, 60, 80 and 100 mV/s. The selected potential range where no faradic current was observed is 0.10 to 0.2 V vs RHE.

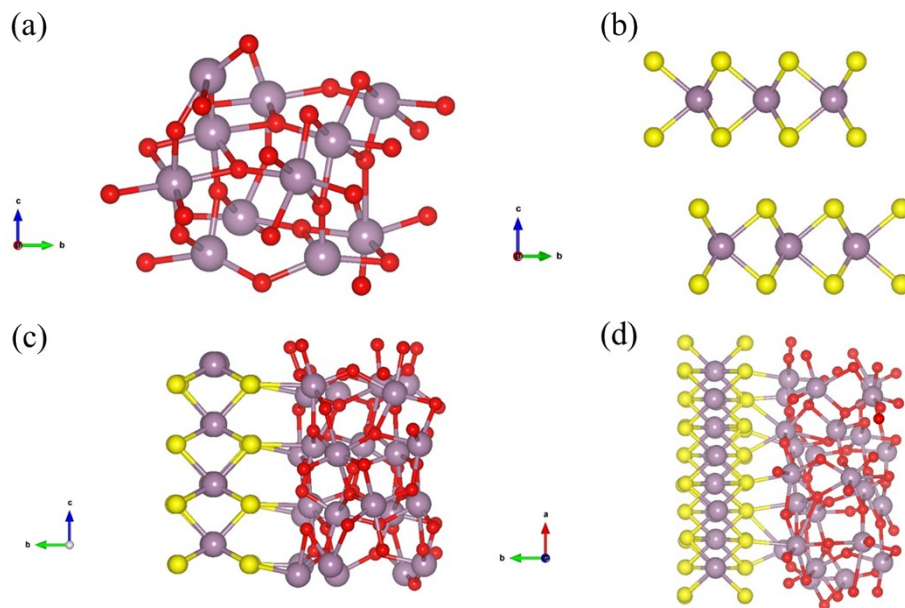

**Fig. S3.** Geometry-optimized models of  $\text{MoO}_2$ ,  $\text{MoS}_2$  and  $\text{MoO}_2/\text{MoS}_2$  heterostructure. (a)  $\text{MoO}_2$  (-211); (b)  $\text{MoS}_2$  (002); (c)  $\text{MoO}_2/\text{MoS}_2$  heterostructure (layer-side views); (d)  $\text{MoO}_2/\text{MoS}_2$  heterostructure (layer-top views). The atoms in red lilac, yellow and red colors represent Mo, S, and O element, respectively.

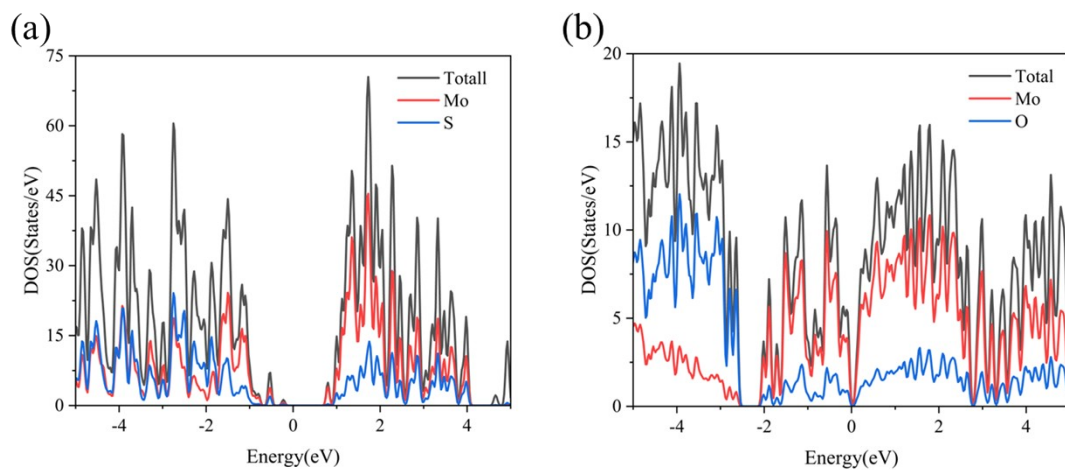

**Fig. S4.** Total density of states for  $\text{MoS}_2$  (a) and  $\text{MoO}_2$  (b).

**Table S1.** Comparison of electrocatalytic performance in acidic media for MoO<sub>2</sub>/MoSe<sub>2</sub>@CNT with other MoS<sub>2</sub>-based and MoO<sub>2</sub>-based electrocatalysts.

| catalyst                                          | $\eta(\text{mV})$ for $j=10$<br>$\text{mA cm}^{-2}$ | Tafel slope<br>( $\text{mV dec}^{-1}$ ) | References                                      |
|---------------------------------------------------|-----------------------------------------------------|-----------------------------------------|-------------------------------------------------|
| MoS <sub>2</sub>                                  | -330                                                | 110                                     | Electrochim. Acta, 2019, 300, 45-52.            |
| MoS <sub>2</sub>                                  | -330.8                                              | 101.1                                   | ACS Appl. Energy Mater., 2019, 2, 5799-5808.    |
| MoO <sub>2</sub>                                  | -477                                                | 192                                     | ACS Appl. Nano Mater. 2023, 6, 13926-13934.     |
| MoO <sub>2</sub>                                  | -233                                                | 123                                     | Nanotechnology, 28, 465404.                     |
| MoS <sub>2</sub> /MoO <sub>2</sub> /MF            | -154                                                | 52.1                                    | Int. J. Hydrogen Energ., 2020, 45, 17422-17433. |
| MoS <sub>2</sub> -MoO <sub>2</sub> /CW            | -148                                                | 86.7                                    | ACS Appl. Nano Mater. 2022, 5, 8175-8183.       |
| MoS <sub>2</sub> /MoO <sub>2</sub>                | -380                                                | 113                                     | Mater. Res. Lett., 2019, 7, 275-281.            |
| MoO <sub>2</sub> /MoSe <sub>2</sub>               | -167                                                | 68                                      | Nanotechnology, 28, 465404.                     |
| SnS <sub>2</sub> /MoS <sub>2</sub>                | -240                                                | 65                                      | Electrochim. Acta, 2019, 300, 45-52.            |
| MoS <sub>2</sub> @Bi <sub>2</sub> Se <sub>3</sub> | -208                                                | 57                                      | J. Catal., 2020, 381, 590-598                   |
| MoO <sub>2</sub> /MoS <sub>2</sub> @CNT           | -158                                                | 70                                      | This work                                       |

MF: Mo foil

CW: carbonized wood

CNT: carbon nanotubes

## References

- [1] Xianpei Ren, Qingbo Wei, Fei Wu, Yonghua Wang, Liangjun Zhao, CNT/VS<sub>2</sub>-MoS<sub>2</sub> with multi-interface structure for improved hydrogen evolution reaction, *Chem. Commun.*, 2021, **57**, 2531-2534.
